# Supplementary material for: Spinel CoMn2O4nanoparticles supported on a nitrogen and phosphorus dual doped graphene aerogel as efficient electrocatalysts for the oxygen reduction reaction
Source: Royal Society of Chemistry journal article supplement (doi:10.1039/c6ra16337h), 2016-01-01
Supplement: c6ra16337h1.pdf [file c6ra16337h1.pdf]

## Supplementary Information

Spinel  $\text{CoMn}_2\text{O}_4$  Nanoparticles Supported on Nitrogen and Phosphorus Dual Doped  
Graphene Aerogel as Efficient Electrocatalysts for the Oxygen Reduction Reaction

Wenhui Guo,<sup>a</sup> Xiuxiu Ma,<sup>a</sup> Xianlei Zhang,<sup>a</sup> Yaqing Zhang,<sup>a</sup> Dingling Yu,<sup>a</sup> Xingquan He,<sup>\*a</sup>

*Department of Chemistry and Chemical Engineering, Changchun University of*

*Science and Technology, Changchun 130022, P. R. China.*

---

\* Corresponding author. Tel.+86-431-85583430

E-mail address:hexingquan@hotmail.com (Xingquan He)

## Supplementary data

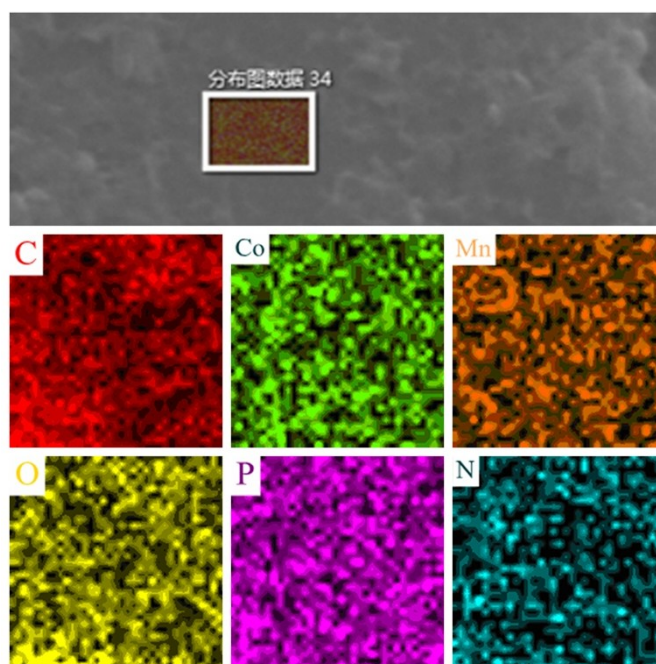

Fig. S1. The EDS of the selected region of the CoMn<sub>2</sub>O<sub>4</sub>/NPGA is shown.

The EDS shows the presence of C, Co, Mn, O, P and N (Fig. S1). All doping elements were homogeneously distributed throughout the whole carbon matrix.

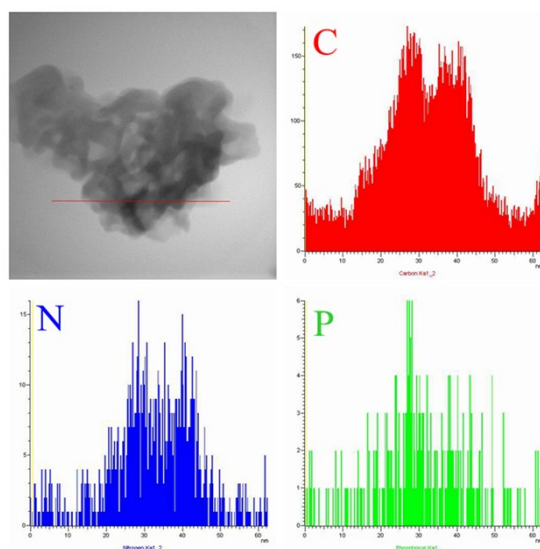

Fig. S2. The EDS of the selected line of the NPGA is shown

The EDS shows the presence of C, N and P of NPGA (Fig. S2).

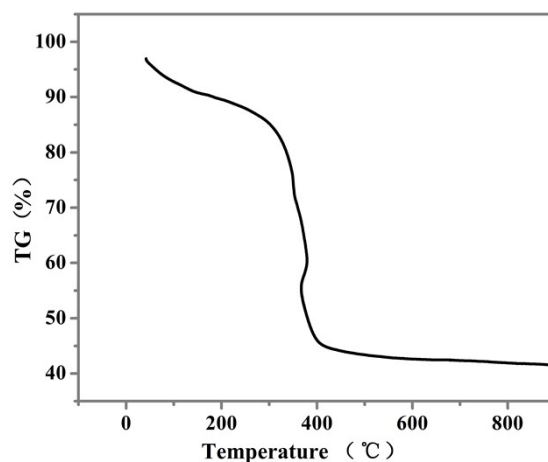

Fig. S3. TGA curve of the CoMn<sub>2</sub>O<sub>4</sub>/NPGA.

Table S1: Relative surface concentrations of nitrogen and phosphorus species obtained by N1s high-resolution XPS and P2p high-resolution XPS spectra of CoMn<sub>2</sub>O<sub>4</sub>/NPGA.

| Element | Peak                | Surface concentrations |
|---------|---------------------|------------------------|
| N       | pyrrolic N          | 69.3%                  |
|         | pyridinic N         | 30.7%                  |
| P       | C-O-PO <sub>3</sub> | 26.52%                 |
|         | P-N                 | 47.91%                 |
|         | P-C                 | 25.57%                 |

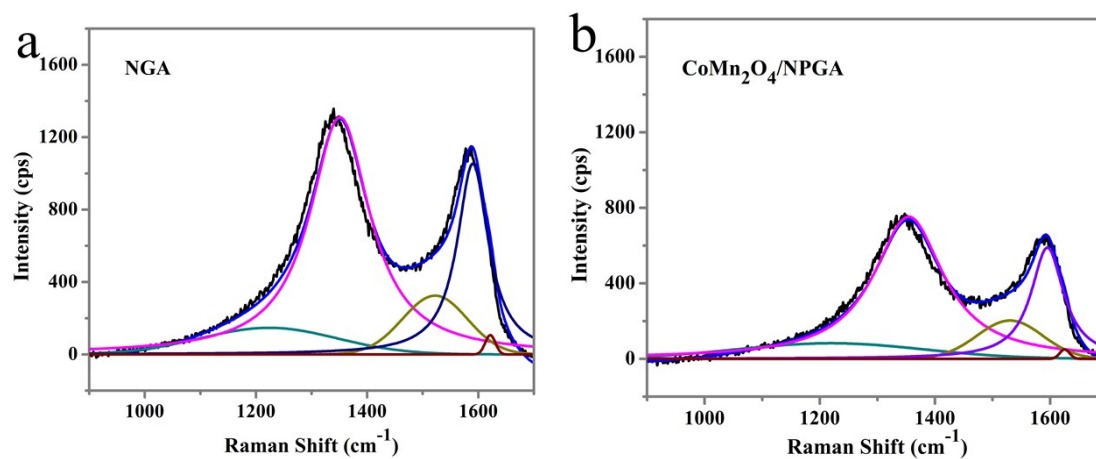

Fig. S4. Raman spectra of NGA (a) and CoMn<sub>2</sub>O<sub>4</sub>/NPGA (b).

Table S2: Raman parameters obtained after curve fitting all the investigated samples.  $\nu_D$  and  $\nu_G$  respectively correspond to D and G bands positions.  $\omega_{1/2D}$  and  $\omega_{1/2G}$  respectively correspond to full width at half-maximum (FWHM) of D and G bands.  $L_a$  represents the in-plane crystallite size determined from  $L_a$  (nm) =  $2.4 \times 10^{-10} \lambda^4_{\text{laser}} \times$

$I_G/I_D$ .

|                                     | NGA  | CoMn <sub>2</sub> O <sub>4</sub> /NPGA |
|-------------------------------------|------|----------------------------------------|
| $\nu_D$ (cm <sup>-1</sup> )         | 1342 | 1345                                   |
| $\omega_{1/2D}$ (cm <sup>-1</sup> ) | 132  | 148                                    |
| $\nu_G$ (cm <sup>-1</sup> )         | 1585 | 1591                                   |
| $\omega_{1/2G}$ (cm <sup>-1</sup> ) | 71   | 72                                     |
| $I_D/I_G$                           | 1.24 | 1.28                                   |
| $L_a$ (nm)                          | 15.5 | 15.0                                   |

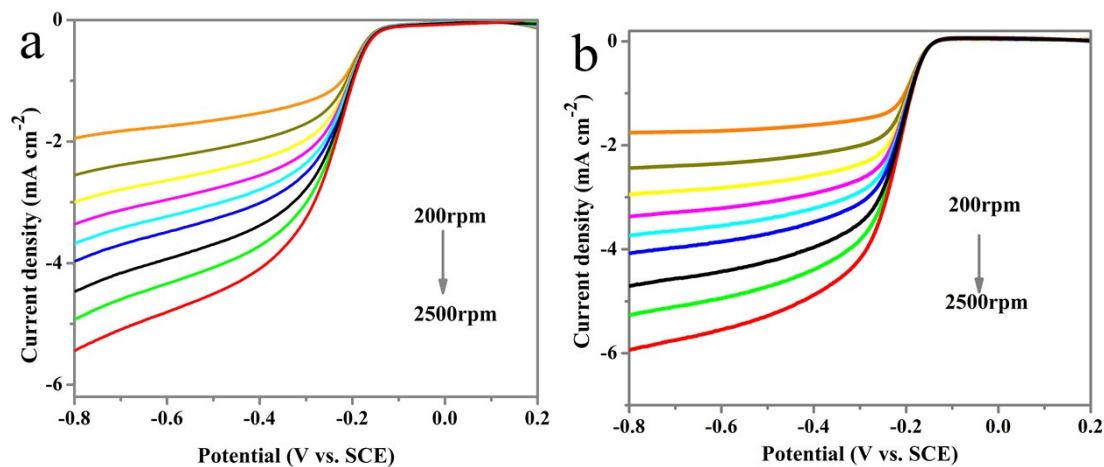

Fig. S5. LSV curves for ORR on (a) NGA and (b) NPGA at different rotation speeds from +0.2 to -0.8 V in O<sub>2</sub>-saturated 0.1 M KOH with the scan rate of 10 mV s<sup>-1</sup>.

Fig. S5 shows the RDE measurements obtained on NGA and NPGA with the rotation rate from 200 to 2500 rpm in O<sub>2</sub>-saturated 0.1M KOH solution. The ORR potential of NGA began at about -0.147 V vs. SCE and was kept under different rotation speeds. The ORR

potential of NPGA began at about -0.142 V vs. SCE. With increase of the rotation speed, the current density of NGA and NPGA were distinctly enhanced.

Table S3: All values were obtained in alkaline conditions with 0.1 M KOH.

| Electrocatalyst                           | $E_{\text{onset}}^{\text{a,c}}$ | $J_L^{\text{b,c}}$  | Reference electrode | Tafel slope             | Catalyst loading per area | Ref.         |
|-------------------------------------------|---------------------------------|---------------------|---------------------|-------------------------|---------------------------|--------------|
|                                           | V                               | $\text{mA cm}^{-2}$ |                     | $\text{mV decade}^{-1}$ | $\mu\text{g cm}^{-2}$     |              |
| CoMn <sub>2</sub> O <sub>4</sub> /NPGA    | -0.094                          | -5.39               | SCE                 | 77                      | 280                       | In this work |
| FCO/HrGOS                                 | -0.09                           | ~ -5.80             | Ag/AgCl             | 56                      | 1006                      | 1            |
| NiCo <sub>2</sub> O <sub>4</sub> -G       | -0.12                           | ~ -4.10             | SCE                 | 37                      | 407                       | 2            |
| CoFe <sub>2</sub> O <sub>4</sub> /rGO     | -0.136                          | ~ -6.40             | Ag/AgCl             | 67                      | 1006                      | 3            |
| Co <sub>3</sub> O <sub>4</sub> /tmGO      | ~ 0.93                          | ~ -5.00             | RHE                 | 42                      | Not mentioned             | 4            |
| CMO/NGA                                   | 0.10                            | ~ -4.20             | Ag/AgCl             | Not mentioned           | 250                       | 5            |
| CFO/RC-400                                | -0.1                            | -4.86               | Ag/AgCl             | Not mentioned           | 320                       | 6            |
| NiCo <sub>2</sub> O <sub>4</sub> /PGR-110 | -0.12                           | ~-3.00              | Ag/AgCl             | Not mentioned           | 140                       | 7            |
| NiCo <sub>2</sub> O <sub>4</sub> /CMK-3   | -0.09                           | ~2.80               | Ag/AgCl             | Not mentioned           | 210                       | 8            |

<sup>a</sup> Represents the onset potential of various catalysts.

<sup>b</sup> Represents the diffusion-limited current density of the various catalysts at a rotation speed of 1600 rpm and 0.8V.

<sup>c</sup> The onset potential ( $E_{\text{onset}}$ ) and diffusion-limited current density ( $J_L$ ) were obtained from the homologous literature and the corresponding figures in the present study.

## References

[1] W. N. Yan, Z. R. Yang, W. Y. Bian and R. Z. Yang, *Carbon*, 2015, **92**, 74-83.

- [2] D. U. Lee, B. J. Kim and Z. W. Chen, *J. Mater. Chem. A*, 2013, **1**, 4754-4762.
- [3] W. Y. Bian, Z. R. Yang, P. Strasser and R. Z. Yang, *Journal of Power Sources*, 2014, **250**, 196-203.
- [4] Y. Y. Liang, Y. G. Li, H. L. Wang, J. G. Zhou, J. Wang, T. Regier and H. J. Dai, *nature materials*, 2011, **10**, 780-786.
- [5] Y. S. Liu, J. Li, W. Z. Li, Y. M. Li, Q. Y. Chen, F. Q. Zhan, *Journal of Power Sources*, 2015, **299**, 492-500.
- [6] P. X. Li, R. G. Ma, Y. Zhou, Y. F. Chen, Z. Z. Zhou, G. H. Liu, Q. Liu, G. H. Peng and Z. H. Liang, *J. Mater. Chem. A*, 2015, **3**, 15598-15606.
- [7] A. C. Mtukula, J. Shen, X. J. Bo and L. P. Guo, *Journal of Alloys and Compounds*, 2016, **655**, 229-237.
- [8] X. J. Bo, Y. F. Zhang, M. Li, A. Nsabimana and L. P. Guo, *Journal of Power Sources*, 2015, **288**, 1-8.
